# Supplementary material
Source: PubMed Central journal article supplement (PMC9074837)
Supplement: NIHMS1773867-supplement-Supplemental_Publication_Material.pdf [file NIHMS1773867-supplement-Supplemental_Publication_Material.pdf]

## SUPPLEMENTARY MATERIAL

### Methods for supplementary data

We conducted a dedicated search that was specifically aimed at reviewing the original reports or secondary analyses from published randomized controlled clinical trials that investigated medical therapy in patients with HFrEF and reported cardiovascular (CV) outcomes, specifically all-cause mortality and the combined endpoint of CV death and/or HF rehospitalization (or worsening HF). The HFrEF drug classes and related trials (see Supplementary Figure 1) that were evaluated included the more conventional treatment options (angiotensin converting enzyme inhibitors (ACEi), Angiotensin II receptor blockers (ARB), Mineralocorticoid Receptor Antagonists (MRA), Beta-Blockers, Digoxin, Ivabradine and Hydralazine-IsosorbideDinitrate (H-ISDN)) supplemented with newer and more recently investigated HFrEF treatments (Sacubitril/Valsartan, Sodium-glucose co-transporter-2 inhibitors (SGLT2i), Omecamtiv Mecarbil and Vericiguat).

We evaluated clinical outcomes according to baseline eGFR/creatinine clearance if reported and reviewed interaction analyses based on subgroups of CKD in the original report.

Additionally, we searched for individual renal substudies of included randomized clinical trials for the treatment effect according to different subgroups of CKD (according to KDOQI CKD classes (Stage 1 (eGFR >90 mL/min/1.73m<sup>2</sup>), Stage 2 (eGFR 60-89 mL/min/1.73m<sup>2</sup>), Stage 3A (eGFR 45-59 mL/min/1.73m<sup>2</sup>), Stage 3B (eGFR 30-44 mL/min/1.73m<sup>2</sup>), Stage 4 (eGFR 15-29 mL/min/1.73m<sup>2</sup>), and Stage 5 (eGFR <15 mL/min/1.73m<sup>2</sup> or dialysis)) for different clinical outcomes. If data was missing from the published reports for a specific study or drug or analysis we contacted the authors to provide additional information if possible.

Measures of relative risk were extracted from these reports, as well as crude event numbers in each treatment arm from which the absolute risk reduction (ARR) was calculated for the end of the study. From these data, different figures (Supplementary Figure 4-6) were constructed to visualize the effect sizes of all drug classes according to individual studies and different clinical outcomes.

**Supplementary Table 1. Renal function and electrolyte monitoring regimen of RCTs**

| <b>Drug class</b> | <b>RCT (year)</b>                                    | <b>Drug</b>                                                | <b>Discontinuation</b>                                                                                                                                                | <b>Downtitration/dose reduction</b>                                                                                                                                                                                                                                                              | <b>Restart</b>                                               | <b>Renal function and electrolyte monitoring frequency</b>                                                                                             |
|-------------------|------------------------------------------------------|------------------------------------------------------------|-----------------------------------------------------------------------------------------------------------------------------------------------------------------------|--------------------------------------------------------------------------------------------------------------------------------------------------------------------------------------------------------------------------------------------------------------------------------------------------|--------------------------------------------------------------|--------------------------------------------------------------------------------------------------------------------------------------------------------|
| <b>ACEi</b>       | CONSENSUS (1987) <sup>20</sup>                       | Enalapril 2.5mg, 10mg, 20mg or 40mg                        | NA                                                                                                                                                                    | Symptoms of hypotension, other side effects                                                                                                                                                                                                                                                      | NA                                                           | Baseline, week 2,3, 6, 24                                                                                                                              |
|                   | SOLVD Treatment / Prevention (1991) <sup>21,22</sup> | Enalapril 5mg, 10g or 20mg                                 | Significant hypotensive bout secondary to the active agent that cannot be controlled with other measures or if major changes in renal function are detected.          | Symptomatic hypertension, angina, azotemia (increase in serum creatinine by 1.0 mg/dL or greater, not to exceed 4.0 mg/dL), hyperkalemia (serum potassium >5.5 mmol/L), proteinuria (appearance of two-plus protein in urine if previously absent or increase by two grades if already present). | As soon as possible in lower dose, preferably within 2 weeks | Baseline, week 2,4, 6, 8, Month 4, 8, 12 and every 4 months thereafter                                                                                 |
|                   | SAVE (1992) <sup>38</sup>                            | Captopril 6.25mg, 12.5mg, 25mg, 75mg or 150mg              | NA                                                                                                                                                                    | Marked, yet asymptomatic, reductions in blood pressure. Any adverse experience                                                                                                                                                                                                                   | NA                                                           | NA                                                                                                                                                     |
|                   | AIRE (1993) <sup>39</sup>                            | Ramipril 2,5mg, 5mg or 10mg                                | If refused or not tolerated by patient, if attending physician wished to use an open-label ACE inhibitor.                                                             | NA                                                                                                                                                                                                                                                                                               | NA                                                           | NA                                                                                                                                                     |
|                   | TRACE (1995) <sup>40</sup>                           | Trandolapril 1mg, 2mg, 4mg                                 | NA                                                                                                                                                                    | If patient did not tolerate high dose.                                                                                                                                                                                                                                                           | NA                                                           | NA                                                                                                                                                     |
| <b>ARB</b>        | ValHeFT (2001) <sup>24</sup>                         | Valsartan 80mg, 160mg or 320mg                             | NA                                                                                                                                                                    | Standing systolic blood pressure is <90 mmHg, serum creatinine level exceeds 2.0 mg/dL and is greater than 50% above baseline                                                                                                                                                                    | NA                                                           | Baseline, week 2, 4, 6, Month 4, 6, 12 and every 6 months thereafter                                                                                   |
|                   | CHARM-Added <sup>42</sup> (2003)                     | Candesartan 4mg, 8mg, 12mg, 16mg, 20mg, 24mg, 28mg or 32mg | No predefined absolute or relative cutoff for Hyperkalemia or plasma creatinine. Decision to reduce or discontinu study drug was left at the investigator discretion. | NA                                                                                                                                                                                                                                                                                               | NA                                                           | Central: Baseline, week 6, Month 14 and 26<br>Local: Baseline, within 2 weeks of dose escalation or completion of dose titration and yearly thereafter |
|                   | CHARM-Alternative (2003) <sup>43</sup>               |                                                            |                                                                                                                                                                       |                                                                                                                                                                                                                                                                                                  |                                                              |                                                                                                                                                        |
|                   | HEAAL (2009) <sup>31</sup>                           | Losartan 50mg or 150mg                                     | NA                                                                                                                                                                    | NA                                                                                                                                                                                                                                                                                               | NA                                                           | Baseline, Month 1, 4, 9, 12 and every 6 months thereafter                                                                                              |
| <b>MRA</b>        | RALES (1999) <sup>45</sup>                           | Spirolactone 25mg or 50mg                                  | Serious hyperkalemia (serum potassium >6.0                                                                                                                            | Development of hyperkalemia (serum potassium >5.5 mmol/L)                                                                                                                                                                                                                                        | NA                                                           | Baseline, week 4, 8, 12, month 6, 12 and every 6                                                                                                       |

|            |                                    |                                                          |                                                                                                                                                                               |                                                                                                                                                                       |                                                                                                          |                                                                                                                              |
|------------|------------------------------------|----------------------------------------------------------|-------------------------------------------------------------------------------------------------------------------------------------------------------------------------------|-----------------------------------------------------------------------------------------------------------------------------------------------------------------------|----------------------------------------------------------------------------------------------------------|------------------------------------------------------------------------------------------------------------------------------|
|            |                                    |                                                          | mmol/L), serum creatinine of >4.0 mg/dL, intercurrent illness, or any condition in which such a course was deemed medically necessary to protect the patient's best interests |                                                                                                                                                                       |                                                                                                          | months thereafter                                                                                                            |
|            | EPHESUS (2003) <sup>46</sup>       | Eplerenone 25mg or 50mg                                  | Serious hyperkalemia (serum potassium >6.0 mmol/L)                                                                                                                            | Development of hyperkalemia (serum potassium >5.5 mmol/L)                                                                                                             | If serum potassium concentration fell below 5.5 mmol/L                                                   | Baseline, 48 hours, week 1,4,5, 12 and every 3 months thereafter                                                             |
|            | EMPHASIS-HF (2010) <sup>47</sup>   | Eplerenone 25mg or 50mg                                  | Serious hyperkalemia (serum potassium >6.0 mmol/L)                                                                                                                            | Development of hyperkalemia (serum potassium >5.5 mmol/L)                                                                                                             | If potassium levels drop to <5.0 mmol/L                                                                  | Potassium: Baseline, week 4, every 4 months thereafter Serum creatinine: Baseline, Month 5, 13 and every 5 months thereafter |
| <b>BBL</b> | US-Carvedilol (1996) <sup>55</sup> | Carvedilol 6.25mg, 12.5mg, 25mg, 50mg or 100mg           | NA                                                                                                                                                                            | Side effects that were thought to be related either to study drug itself                                                                                              | NA                                                                                                       | NA                                                                                                                           |
|            | CIBIS-II (1999) <sup>59</sup>      | Bisoprolol 1.25mg, 2.50mg, 3.75mg, 5mg, 7.5mg or 10mg    | In case of worsening chronic heart failure                                                                                                                                    | Symptomatic bradycardia or hypotension or following adverse event or worsening chronic heart failure                                                                  | Therapy may be resumed, if warranted, at one or two levels below the dose reached before discontinuation | NA                                                                                                                           |
|            | MERIT-HF (1999) <sup>58</sup>      | Metoprolol 12.5mg, 25mg, 50mg, 100mg or 200mg            | According to judgment of investigator, intolerability of study drug                                                                                                           | According to judgment of investigator, intolerability of study drug                                                                                                   | According to judgment of investigator                                                                    | No protocolized assessment of serum creatinine/potassium at follow up                                                        |
|            | CAPRICORN (2001) <sup>56</sup>     | Carvedilol 6.25mg, 12.5mg, 25mg, 50mg                    | Intolerability of study drug after dose-reduction                                                                                                                             | Intolerability of study drug, presence of adverse events, evidence of clinical heart failure, bradycardia (<50 bpm), systolic blood pressure <80 mmHg                 | NA                                                                                                       | Safety laboratory tests at baseline, and every 6 months thereafter                                                           |
|            | COPERNICUS (2001) <sup>57</sup>    | Carvedilol 6.25mg, 12.5mg, 25mg, 50mg                    | Intolerability to lowest dose of study drug                                                                                                                                   | Intolerability of study drug, presence of adverse events, evidence of clinical heart failure, bradycardia (<50 bpm), systolic blood pressure <80 mmHg                 | Investigators encouraged to rechallenge                                                                  | NA                                                                                                                           |
|            | BEST (2001) <sup>66</sup>          | Bucindolol 3mg, 6.25mg, 12.5mg, 25mg, 50mg, 100mg, 200mg | At the discretion of the investigator, patients who develop worsening heart failure                                                                                           | At the discretion of the investigator, increase in heart failure symptoms, side effects of study medication such as impotence, dizziness, lightheadedness, nightmares | Encouraged as soon as the patient is clinically stable                                                   | Clinical Laboratory at Baseline, month 3 and 12                                                                              |

|                |                                      |                                      |                                                                                                                                                                                                                 |                                                                                                                                                                                                                                                                                                                                       |                                |                                                                                |
|----------------|--------------------------------------|--------------------------------------|-----------------------------------------------------------------------------------------------------------------------------------------------------------------------------------------------------------------|---------------------------------------------------------------------------------------------------------------------------------------------------------------------------------------------------------------------------------------------------------------------------------------------------------------------------------------|--------------------------------|--------------------------------------------------------------------------------|
|                | SENIORS (2005) <sup>60</sup>         | Nebivolol 1.25mg, 2.5mg, 5mg or 10mg | Depending on symptoms, possible side-effects, or at judgment of the local investigator                                                                                                                          | Depending on symptoms of intolerance (resting heart rate <50 bpm, systolic blood pressure <90 mmHg, drop in systolic blood pressure >30 mmHg on standing pressure, symptoms of postural hypertension or new symptoms of dizziness interfering with daily activities), possible side-effects, or at judgment of the local investigator | NA                             | Baseline, month 4, 6, 9, 12, 15, 24 and 30                                     |
| <b>ARNI</b>    | PARADIGM-HF (2014) <sup>77</sup>     | Sacubitril/valsartan                 | Potassium >6.0 mmol/L immediately discontinue, potassium >5.5 and <6.0 mmol/L consider discontinuation                                                                                                          | Potassium >5.3 but <5.5 mmol/L, potassium >5.5 and <6.0 mmol/L, Persisting symptomatic hypotension, clinically significant decrease in eGFR/increase in serum creatinine (eGFR decrease >40%, creatinine rises above 3mg/dL)                                                                                                          | Every attempt should be made   | Baseline, week 2, 4, Month 2, 4, 8, 12 and every 4 months thereafter           |
|                | PIONEER (2019) <sup>81</sup>         | Sacubitril/valsartan                 | Pregnancy, any severe suspected drug related AE, angioedema                                                                                                                                                     | Depending on serum potassium, blood pressure, or eGFR                                                                                                                                                                                                                                                                                 | As soon as medically justified | Baseline, week 1, 2, 4, 8, 10, 12                                              |
| <b>SGLT2-i</b> | DAPA-HF (2019) <sup>82</sup>         | Dapagliflozin 5mg or 10mg            | Diabetic ketoacidosis, pregnancy, use of other SGLT-2 or combined SGLT-1 inhibitors                                                                                                                             | Unexpected acute declines in eGFR, volume depletion/hypotension                                                                                                                                                                                                                                                                       | Always encouraged              | Baseline, week 2, Month 2, 4, 8, 12 and every 4 <sup>th</sup> month thereafter |
|                | EMPEROR-Reduced (2020) <sup>83</sup> | Empagliflozin 10mg                   | Diabetic ketoacidosis, pregnancy, use of other SGLT-2 or combined SGLT-1 inhibitors                                                                                                                             | Additional laboratory assessment if eGFR drops ≥40% or below 15 mL/min/1.73m <sup>2</sup> (if eGFR ≥ 30 mL/min/1.73m <sup>2</sup> at baseline) or below 10 mL/min/1.73m <sup>2</sup> (if eGFR < 30 mL/min/1.73m <sup>2</sup> at baseline)                                                                                             | Consider at every visit        | Baseline, week 4, Month 3, 8, 12 and every 6 months thereafter                 |
|                | SOLOIST-WHF (2020) <sup>84</sup>     | Sotagliflozin 200mg or 400mg         | Diabetic ketoacidosis, severe hypoglycemia, pregnancy, dialysis or renal transplantation, eGFR <15ml/min/1.73m <sup>2</sup> (Twice measured), hospital admission for major surgical procedures, serious illness | Evidence of volume depletion, symptomatic hypotension (dizziness, lightheadedness), AEs intolerable to the patient (polyuria, nocturia), lower extremity complications (skin ulcers, infection, osteomyelitis, gangrene)                                                                                                              | Early as possible              | Baseline, week 2, Month 1, 4 and every 4 months thereafter                     |

## Supplementary Figure 1

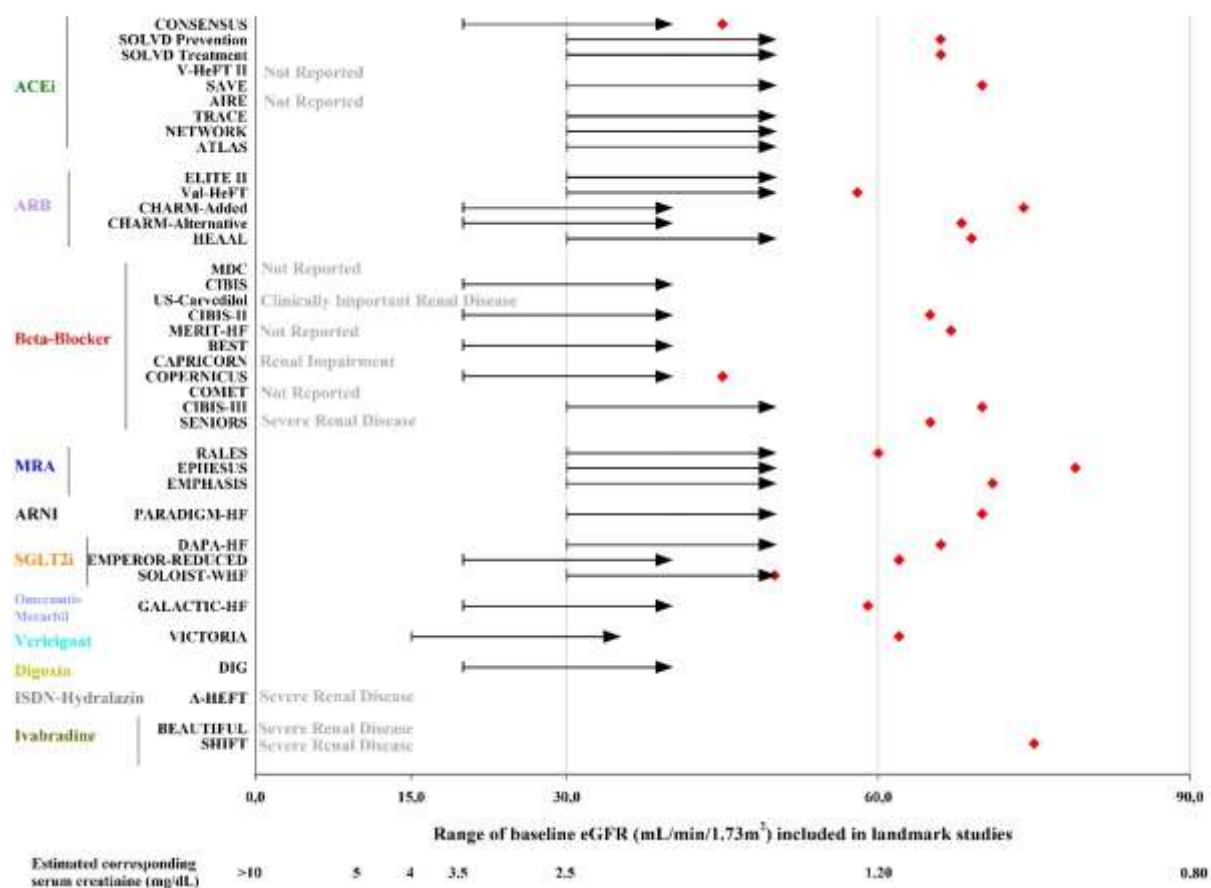

Red diamond symbols show mean eGFR at baseline for the study population. The black arrow indicates the lower limit of inclusion and that there was no upper limit of eGFR for any trial. Abbreviations: ACEi: Angiotensin Converting Enzyme Inhibitor, ARB: Angiotensin II Receptor Blocker, ARNI: Angiotensin Receptor blocker, Nprilysin Inhibitor, Beta-blocker: Beta-Blocker, CI: Confidence Interval, CV: Cardiovascular, eGFR: Estimated Glomerular Filtration Rate, H-ISDN: Hydralazine IsosorbideDinitrate, HR: Hazard Ratio, HF: Heart Failure, MRA: Mineralocorticoid Receptor Antagonist, SGLT2i: Sodium glucose co-transporter 2 inhibitor.

### Study Acronyms

|                   |                                                                                                                                  |
|-------------------|----------------------------------------------------------------------------------------------------------------------------------|
| A-HEFT            | African-American Heart Failure Trial                                                                                             |
| AIRE              | Acute Infarction Ramipril Efficacy                                                                                               |
| ATLAS             | Assessment of Treatment with Lisinopril and Survival                                                                             |
| BEAUTIFUL         | Morbidity-mortality Evaluation of the If inhibitor ivabradine in patients with coronary disease and left-ventricular dysfunction |
| BEST              | Beta-Blocker Evaluation of Survival Trial                                                                                        |
| CAPRICORN         | Carvedilol Post Infarct Survival Control in LV Dysfunction                                                                       |
| CHARM-Added       | Candesartan in Heart failure: Assessment of Reduction in Mortality and morbidity Added trial                                     |
| CHARM-Alternative | Candesartan in Heart failure: Assessment of Reduction in Mortality and morbidity Alternative trial                               |

|                  |                                                                                                                           |
|------------------|---------------------------------------------------------------------------------------------------------------------------|
| CIBIS            | Cardiac Insufficiency Bisoprolol Study                                                                                    |
| CIBIS-II         | Cardiac Insufficiency Bisoprolol Study II                                                                                 |
| COMET            | Carvedilol Or Metoprolol European Trial                                                                                   |
| COMPANION        | Comparison of Medical Therapy, Pacing, and Defibrillation in Heart Failure                                                |
| CONSENSUS        | Cooperative North Scandinavian Enalapril Survival Study                                                                   |
| COPERNICUS       | Carvedilol Prospective Randomized Cumulative Survival                                                                     |
| DAPA-HF          | Dapagliflozin and Prevention of Adverse Outcomes in Heart Failure,                                                        |
| DIG              | Digitalis Investigation Group                                                                                             |
| ELITE II         | Evaluation of Losartan In The Elderly study II                                                                            |
| EMPEROR-Reduced  | Empagliflozin Outcome Trial in Patients with Chronic Heart Failure and Reduced Ejection Fraction                          |
| EMPHASIS         | Eplerenone in Mild Patients Hospitalization and Survival Study in Heart Failure                                           |
| EPHESUS          | Eplerenone Post–Acute Myocardial Infarction Heart Failure Efficacy and Survival Study                                     |
| GALACTIC-HF      | Global Approach to Lowering Adverse Cardiac Outcomes through Improving Contractility in Heart Failure                     |
| HEAAL            | Heart failure Endpoint evaluation of Angiotensin II Antagonist Losartan                                                   |
| MDC              | Metoprolol in Dilated Cardiomyopathy                                                                                      |
| MERIT-HF         | Metoprolol CR/XL Randomised Intervention Trial in Congestive Heart Failure                                                |
| PARADIGM-HF      | Prospective Comparison of ARNI with ACE inhibition to Determine Impact on Global Mortality and Morbidity in Heart Failure |
| RALES            | Randomized Aldactone Evaluation Study                                                                                     |
| SAVE             | Survival And Ventricular Enlargement                                                                                      |
| SENIORS          | Study of the Effects of Nebivolol Intervention on Outcomes and Rehospitalisation in Seniors with Heart Failure            |
| SHIFT            | Systolic Heart failure treatment with the If inhibitor ivabradine Trial                                                   |
| SOLOIST-WHF      | The effect of Sotagliflozin on Cardiovascular Events in Patients with Type 2 Diabetes Post Worsening Heart Failure        |
| SOLVD Prevention | Studies of Left Ventricular Dysfunction Prevention                                                                        |
| SOLVD Treatment  | Studies of Left Ventricular Dysfunction Treatment                                                                         |
| TRACE            | Trandolapril Cardiac Evaluation                                                                                           |
| US-Carvedilol    | United States Carvedilol                                                                                                  |
| Val-HeFT         | Valsartan Heart Failure Trial                                                                                             |
| V-HEFT II        | Vasodilator Heart Failure Trial II                                                                                        |
| VICTORIA         | Vericiguat in the HFrEF population was the VerICguaT Global Study in Subjects with HFrEF                                  |

**Supplementary Table 2. Summary of clinical interpretation of changes in renal function indices during initiation or uptitration of HFrEF drug classes**

| Changes in renal function indices                                                                                                                   |                       |                              |                                     |                                                | Evidence based HFrEF drug classes                                                                 |                                                                                         |                                                                                                                                                                                                                     |                                                                                                                                                                                             |
|-----------------------------------------------------------------------------------------------------------------------------------------------------|-----------------------|------------------------------|-------------------------------------|------------------------------------------------|---------------------------------------------------------------------------------------------------|-----------------------------------------------------------------------------------------|---------------------------------------------------------------------------------------------------------------------------------------------------------------------------------------------------------------------|---------------------------------------------------------------------------------------------------------------------------------------------------------------------------------------------|
| Increase in serum creatinine (%)                                                                                                                    | Decrease in eGFR* (%) | Max serum creatinine (mg/dL) | Min eGFR mL/min/1.73 m <sup>2</sup> | Max serum potassium (mmol/L)                   | ACEi/ARB/ARNI                                                                                     | MRA                                                                                     | SGLT2i#                                                                                                                                                                                                             | Beta-Blocker                                                                                                                                                                                |
| < 50                                                                                                                                                | < 30                  | 2.5                          | 30                                  | 5.0                                            | None, uptitrate and evaluate renal function and electrolytes                                      | None, uptitrate and evaluate renal function and electrolytes                            | None, continue SGLT2i and reevaluate renal function regularly                                                                                                                                                       | Beta-Blockers do not cause a change in eGFR/serum creatinine. Revise clinical context, determine alternative cause of renal function worsening, including deterioration in clinical setting |
| 50-100                                                                                                                                              | 30-50                 | 3.5                          | 20                                  | 5.5                                            | Evaluate clinical status and other causes of WRF. Consider halving ACEi/ARB/ARNI and re-evaluate  | Evaluate clinical status and other causes of WRF. Consider halving MRA and re-evaluate  | Continue SGLT2i if eGFR/or serum creatinine are acceptable. Evaluate other causes in parallel.                                                                                                                      |                                                                                                                                                                                             |
| > 100                                                                                                                                               | > 50                  | > 3.5                        | < 20                                | > 5.5<br><i>(for ACEi / ARB / ARNI/SGLT2i)</i> | Evaluate clinical status and other causes of WRF. Consider stopping ACEi/ARB/ARNI and re-evaluate |                                                                                         | Such large increases in serum creatinine are unexpected with SGLT2i and should prompt further evaluation. If deemed clinically appropriate, continue SGLT2i with close monitoring, if no other option, stop SGLT2i. |                                                                                                                                                                                             |
|                                                                                                                                                     |                       |                              |                                     | > 6.0<br><i>(For MRA)</i>                      |                                                                                                   | Evaluate clinical status and other causes of WRF. Consider stopping MRA and re-evaluate |                                                                                                                                                                                                                     |                                                                                                                                                                                             |
| Rechallenge after 2-4 weeks (if possible at lower dose) when dosing reduced or stopped all together if renal function and/or potassium has improved |                       |                              |                                     |                                                |                                                                                                   |                                                                                         |                                                                                                                                                                                                                     |                                                                                                                                                                                             |

\* arbitrary increase # clinical opinion in the absence of strong evidence

**Supplementary Figure 2. Association between baseline eGFR and Absolute Risk Reduction of All-cause Mortality on study level**

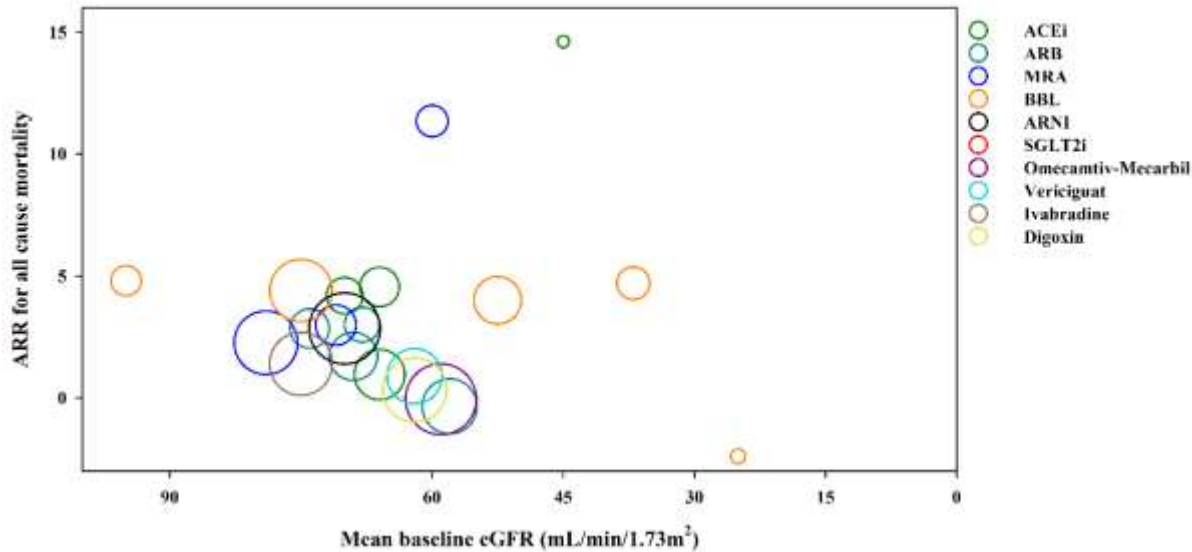

Shown are the mean baseline eGFR in relation to the absolute risk reduction in the overall individual study, or if available, data from specific subgroups of CKD in the individual studies. ARNI data represents PARADIGM-HF study, which had as active control enalapril. Area of the circle is proportional to the study size. Abbreviations: ACEi: Angiotensin Converting Enzyme Inhibitor, ARB: Angiotensin II Receptor Blocker, ARNI: Angiotensin Receptor blocker, ARR: Absolute Risk Reduction, Neprilysin Inhibitor, Beta-blocker: Beta-Blocker, CI: Confidence Interval, CV: Cardiovascular, eGFR: Estimated Glomerular Filtration Rate, H-ISDN: Hydralazine IsosorbideDinitrate, HF: Heart Failure, MRA: Mineralocorticoid Receptor Antagonist, SGLT2i: Sodium glucose co-transporter 2 inhibitor.



**Supplementary Figure 3. Association between baseline eGFR and Absolute Risk Reduction of CV death or HF hospitalization on study level**

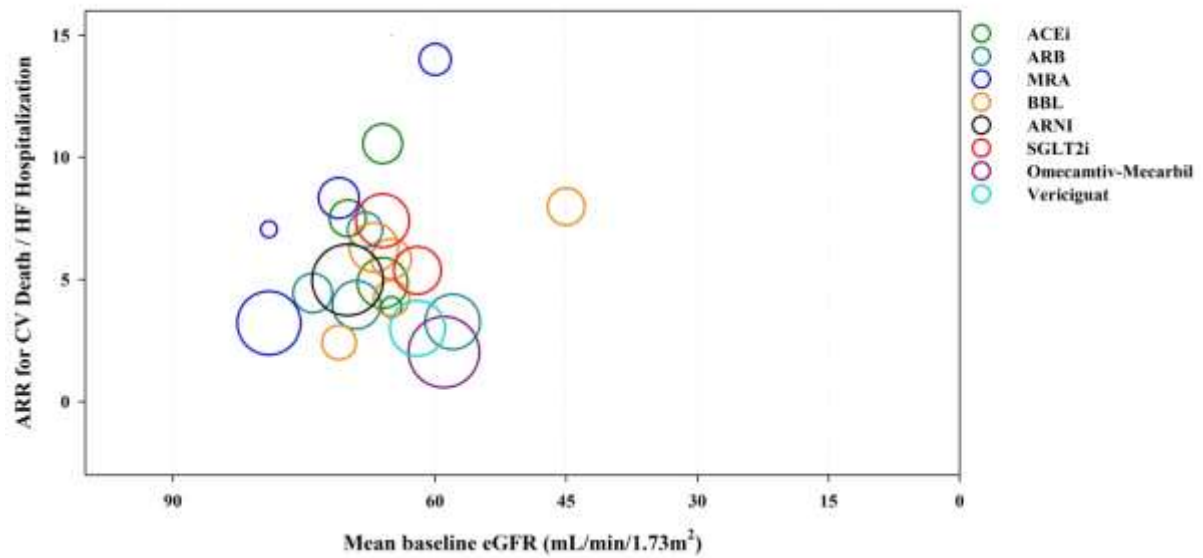

Shown are the mean baseline eGFR in relation to the absolute risk reduction in the overall individual study, or if available, data from specific subgroups of CKD in the individual studies. ARNI data represents PARADIGM-HF study, which had as active control enalapril. Area of the circle is proportional to the study size. Abbreviations: ACEi: Angiotensin Converting Enzyme Inhibitor, ARB: Angiotensin II Receptor Blocker, ARNI: Angiotensin Receptor blocker, ARR: Absolute Risk Reduction, Nephilysin Inhibitor, Beta-blocker: Beta-Blocker, CI: Confidence Interval, CV: Cardiovascular, eGFR: Estimated Glomerular Filtration Rate, H-ISDN: Hydralazine IsosorbideDinitrate, HF: Heart Failure, MRA: Mineralocorticoid Receptor Antagonist, SGLT2i: Sodium glucose co-transporter 2 inhibitor.

Supplementary Figure 4. Summary of effects of ACEi/ARB/MRA on clinical endpoints to CKD groups

A)

B)

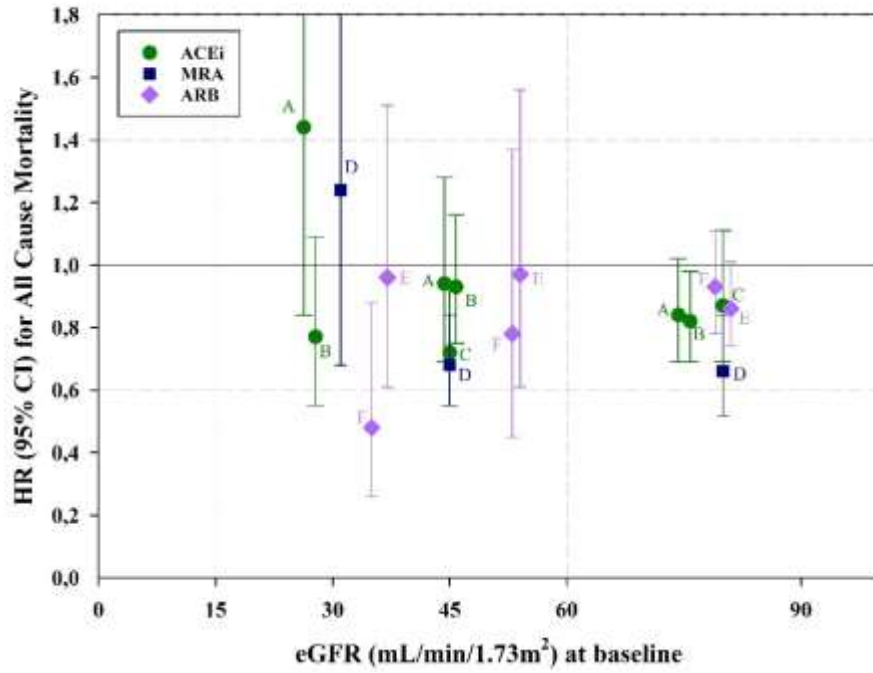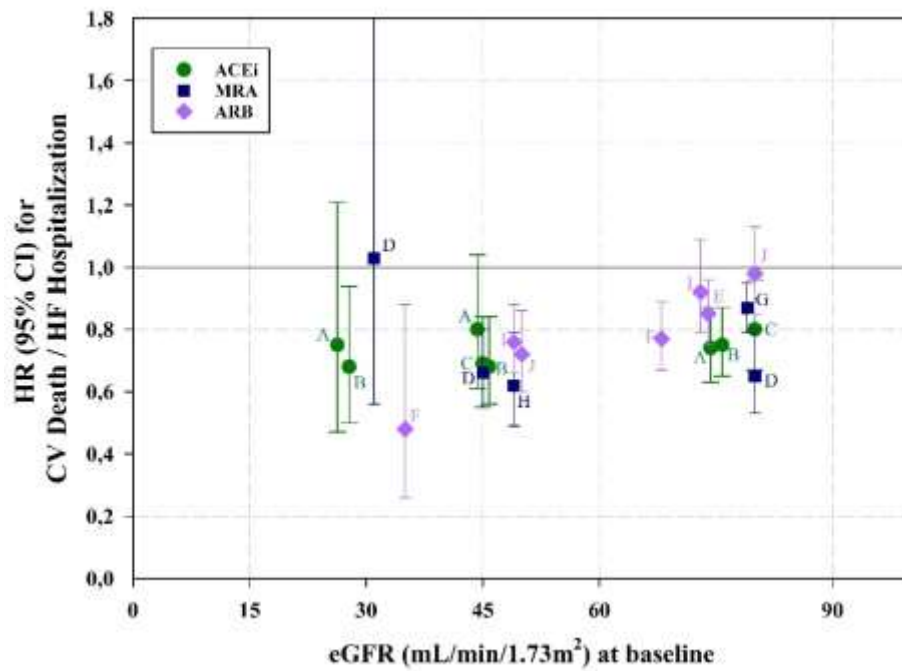

A) All Cause Mortality and B) CV Death / HF Hospitalization

Depicted are Hazard Ratio's and 95% Confidence Intervals for the treatment effect within CKD stages, or if not available the overall treatment effect at the study mean eGFR. Abbreviations: ACEi: Angiotensin Converting Enzyme Inhibitor, ARB: Angiotensin II Receptor Blocker, CI: Confidence Interval, eGFR: Estimated Glomerular Filtration Rate, HR: Hazard Ratio, MRA: Mineralocorticoid Receptor Antagonist.

- A) SOLVD-Prevention<sup>25-27,29</sup>
- B) SOLVD-Treatment<sup>25-27,29</sup>
- C) SAVE<sup>41</sup>
- D) RALES<sup>50</sup>
- E) CHARM-Added<sup>32</sup>
- F) CHARM-Alternative<sup>32</sup>
- G) EPHESUS<sup>51</sup>
- H) EMPHASIS-HF<sup>48</sup>
- I) ValHeFT<sup>33</sup>
- J) HEAAL<sup>31</sup>

Supplementary Figure 5. Summary of effects of Beta-blocker/Digoxin/Ivabradine on clinical endpoints according to CKD groups

A)

B)

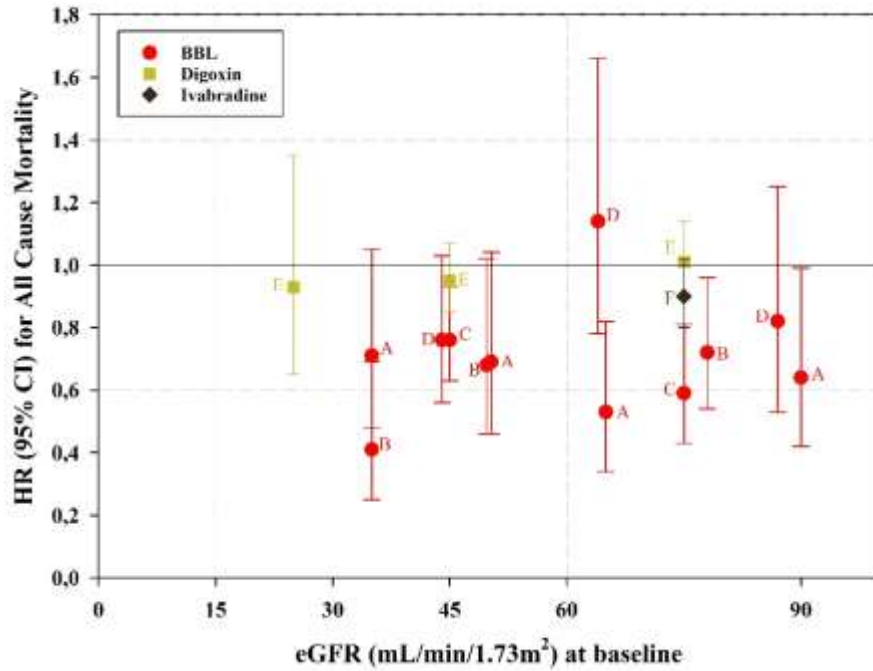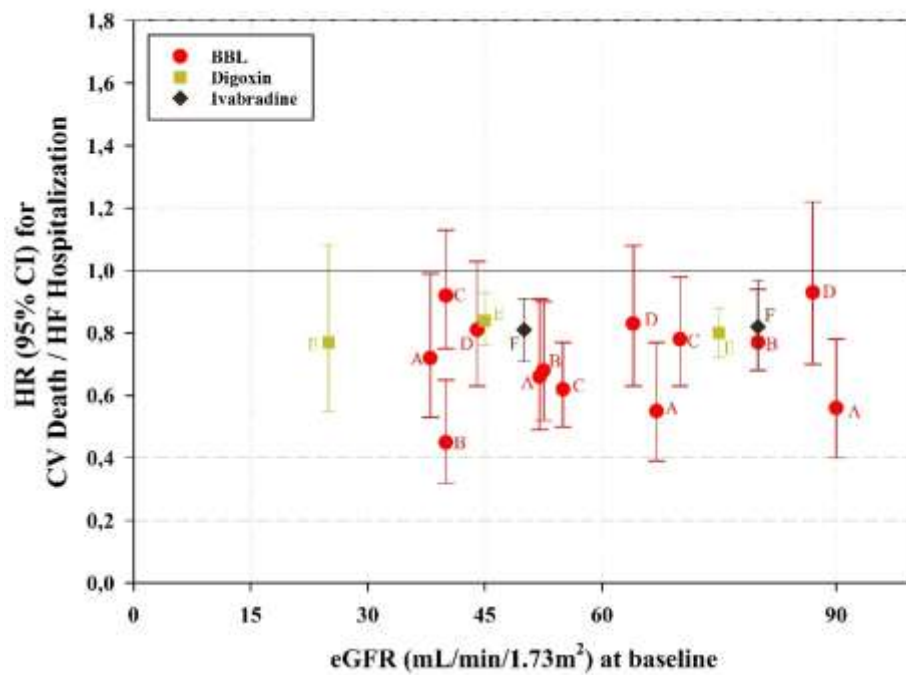

A) All Cause Mortality and B) CV Death / HF Hospitalization

Depicted are Hazard Ratio's and 95% Confidence Intervals for the treatment effect within CKD stages, or if not available the overall treatment effect at the study mean eGFR. Abbreviations: Beta-blocker: Beta-Blocker, CI: Confidence Interval, eGFR: Estimated Glomerular Filtration Rate, HR: Hazard Ratio.

- A) CIBIS-II<sup>61</sup>
- B) MERIT-HF<sup>63</sup>
- C) CAPRICORN/COPERNICUS<sup>64</sup>
- D) SENIORS<sup>65</sup>
- E) DIG<sup>70</sup>
- F) SHIFT<sup>68</sup>

Supplementary Figure 6. Summary of effects of ARNI/SGLT2i/Vericiguat/Omecamtiv-Mecarbil on clinical endpoints according to CKD groups

A)

B)

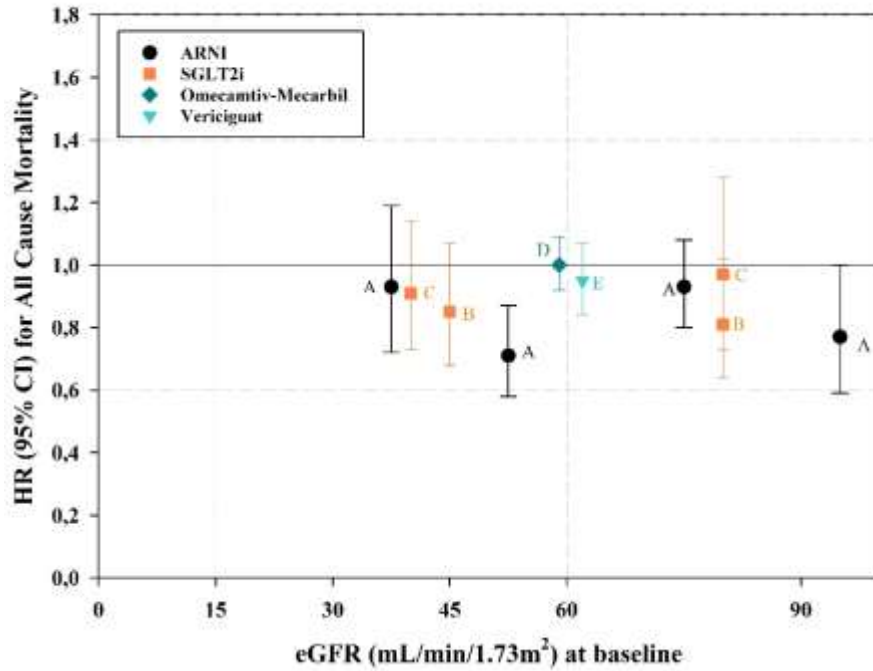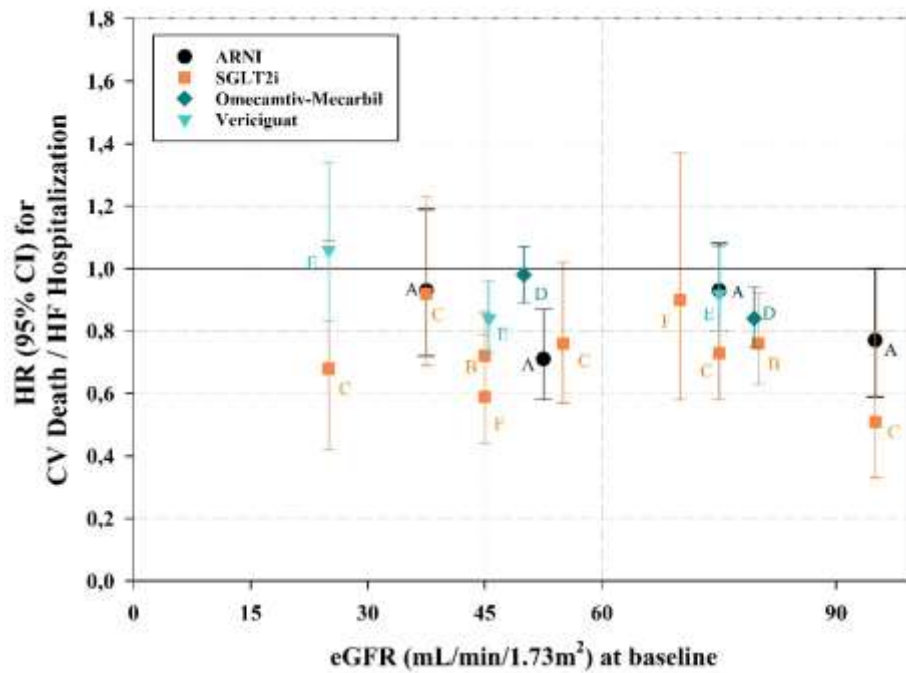

A) All Cause Mortality and B) CV Death / HF Hospitalization

Depicted are Hazard Ratio's and 95% Confidence Intervals for the treatment effect within CKD stages, or if not available the overall treatment effect at the study mean eGFR. Abbreviations:

ARNI: Angiotensin Receptor blocker Neprilysin Inhibitor, CI: Confidence Interval, eGFR:

Estimated Glomerular Filtration Rate, HR: Hazard Ratio.

- A) PARADIGM-HF<sup>80</sup>
- B) DAPA-HF<sup>86</sup>
- C) EMPEROR-Reduced<sup>85</sup>
- D) GALACTIC-HF<sup>97</sup>
- E) VICTORIA<sup>96</sup>
- F) SOLOIST-WHF<sup>84</sup>
